# Supplementary material for: Large-eddy simulations of surface roughness parameter sensitivity to canopy-structure characteristics
Source: Copernicus journal article supplement (doi:10.5194/bg-12-2533-2015), 2015-04-30

Supplement of Biogeosciences, 12, 2533–2548, 2015  
<http://www.biogeosciences.net/12/2533/2015/>  
doi:10.5194/bg-12-2533-2015-supplement  
© Author(s) 2015. CC Attribution 3.0 License.

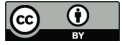

*Supplement of*

## **Large-eddy simulations of surface roughness parameter sensitivity to canopy-structure characteristics**

**K. D. Maurer et al.**

*Correspondence to:* G. Bohrer (bohrer.17@osu.edu)

1 **Supplement: Simulation setup details**

2 **Figure S.1:** ‘Lower’ (---) blue; ‘Middle’ (---) cyan; ‘Upper’ (···) green; and ‘Natural’ (solid line)  
3 yellow (mean observed in the US-UMB forest plot), vertical LAD profiles used in virtual canopies  
4 for RAFLES simulations.

5

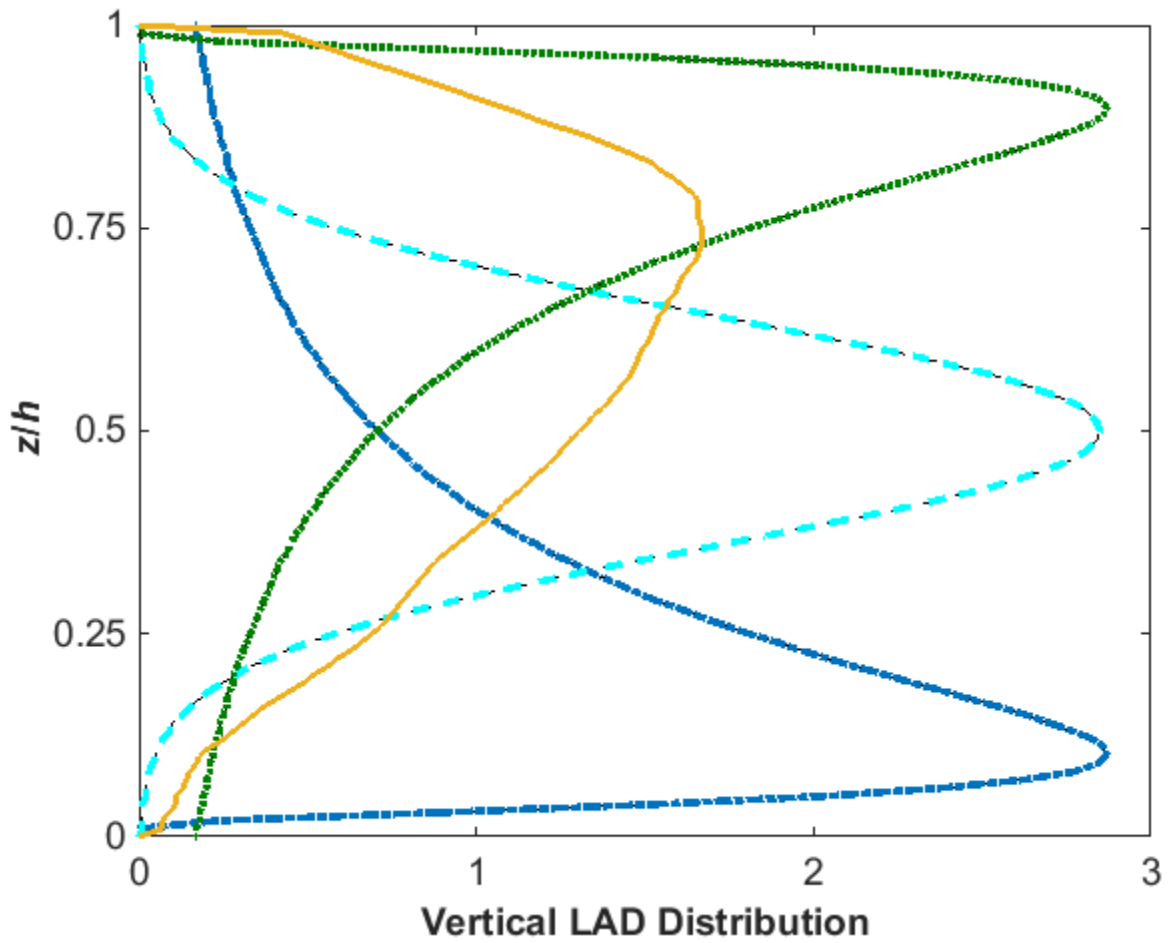

6

**Figure S.2:** Height maps for varied plot-level gap fractions: (a) 100%, (b) 50%, (c) 35%, (d) 25%, (e) 10%, and (f) 0%. Here, gap fraction refers to the percentage of the canopy described by  $h_L$  ( $h = 9$  m, blue) as opposed to  $h_H$  ( $h = 27$  m, green). Distance along the simulation domain is in meters.

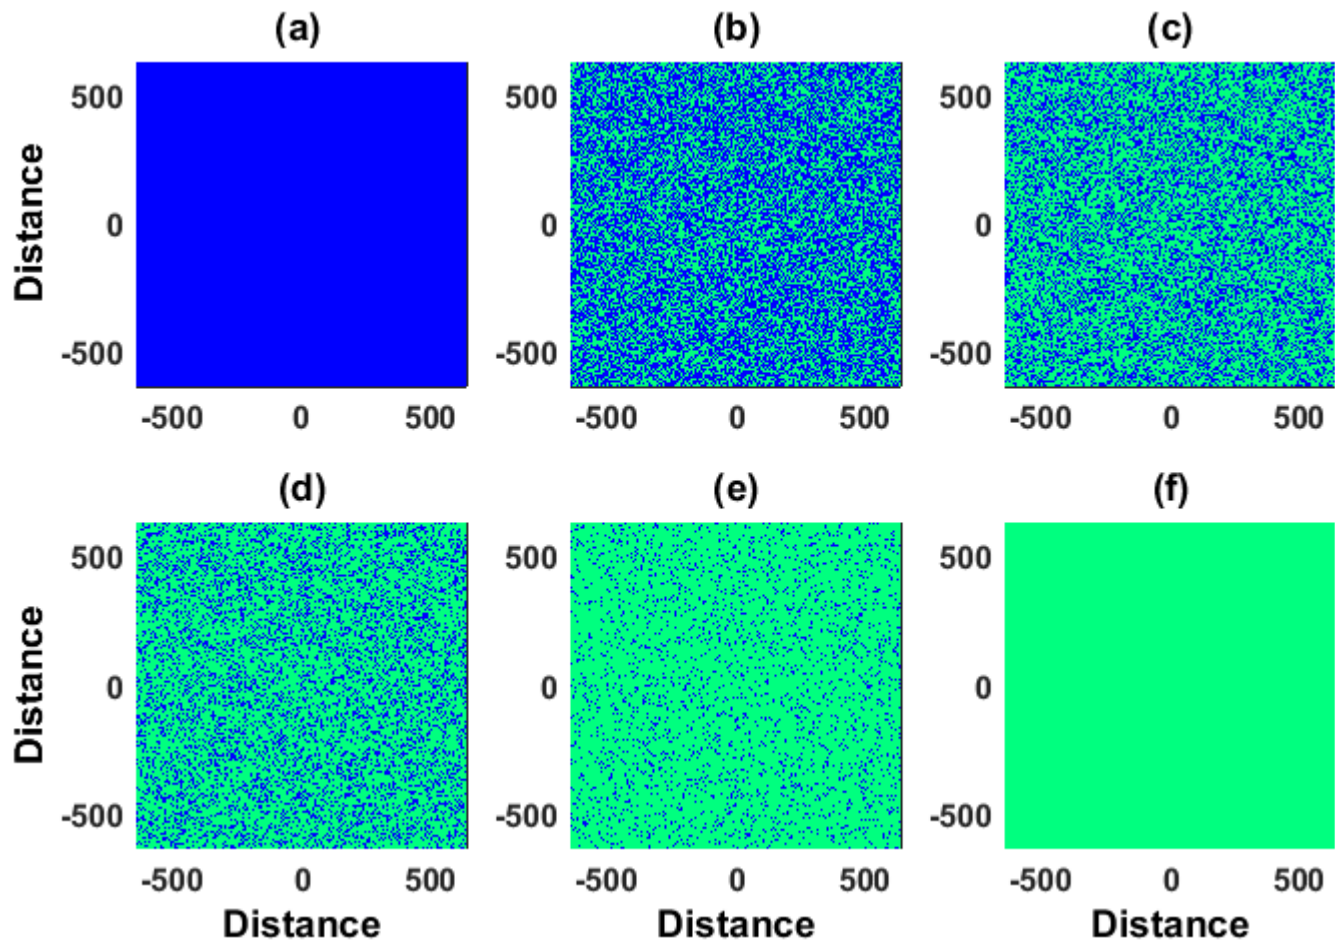

Supplement: Supplementary file 1 [file bg-12-2533-2015-supplement.pdf]
